# Supplementary material for: Electrosensing of an alpha-adrenergic agonist psychoactive methyldopa using a sodium bentonite–graphene oxide nanocomposite
Source: Royal Society of Chemistry journal article supplement (doi:10.1039/c5ay01021g), 2015-01-01
Supplement: c5ay01021g1.pdf [file c5ay01021g1.pdf]

## Electronic Supplementary Information

### Electrosensing of an alpha-adrenergic agonist psychoactive methyl dopa using sodium bentonite-graphene oxide nanocomposite

Nagappa L Teradal<sup>a</sup>, Prashanth S Narayan<sup>a</sup>, Jaldappagari Seetharamappa<sup>a\*</sup>, Ashis K Satpati<sup>b</sup>

<sup>a</sup>Department of Chemistry, Karnatak University, Dharwad-580 003, India.

E-mail: jseetharam@yahoo.com, drjseetharamappa@kud.ac.in;

Fax: +91-836-2747884; Tel: +91 836-221528;

<sup>b</sup>Analytical Chemistry Division, Bhaba Atomic Research Centre, Trombay, Mumbai-400 085, India.

**Table S1** Characteristics of the calibration plot for MD.

|                                | Chronoamperometry | DPV      |
|--------------------------------|-------------------|----------|
| Linearity range, $\mu\text{M}$ | 1.13 – 40.6       | 0.1 - 60 |
| LOD, $\mu\text{M}$             | 0.962             | 0.0403   |
| LOQ, $\mu\text{M}$             | 3.194             | 0.134    |
| Inter-day assay RSD* (%)       | 1.68              | 2.04     |
| Intra-day assay RSD* (%)       | 2.03              | 2.83     |

\* For 5  $\mu\text{M}$  MD

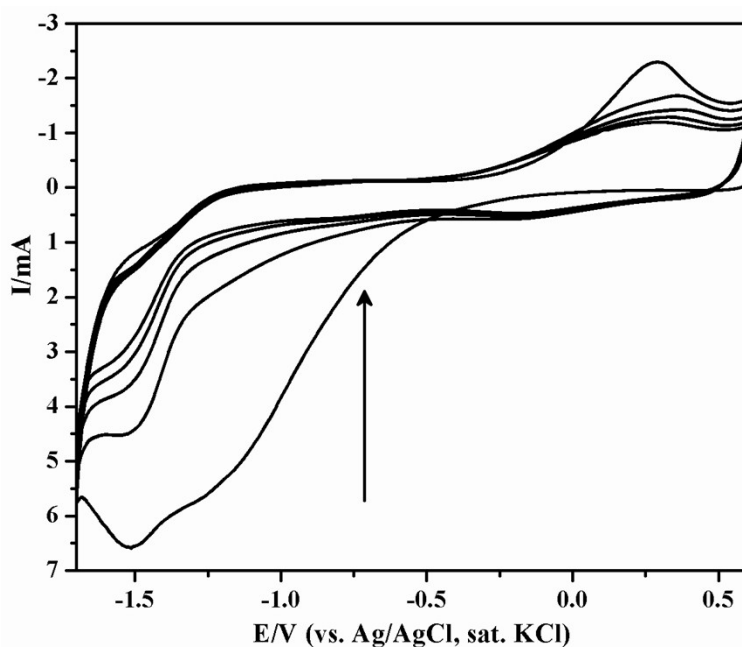

**Fig. S1** Cyclic voltammograms of Bent-GO film at GCE surface in phosphate buffer of pH 6. Scan rate of 100  $\text{mV s}^{-1}$ .

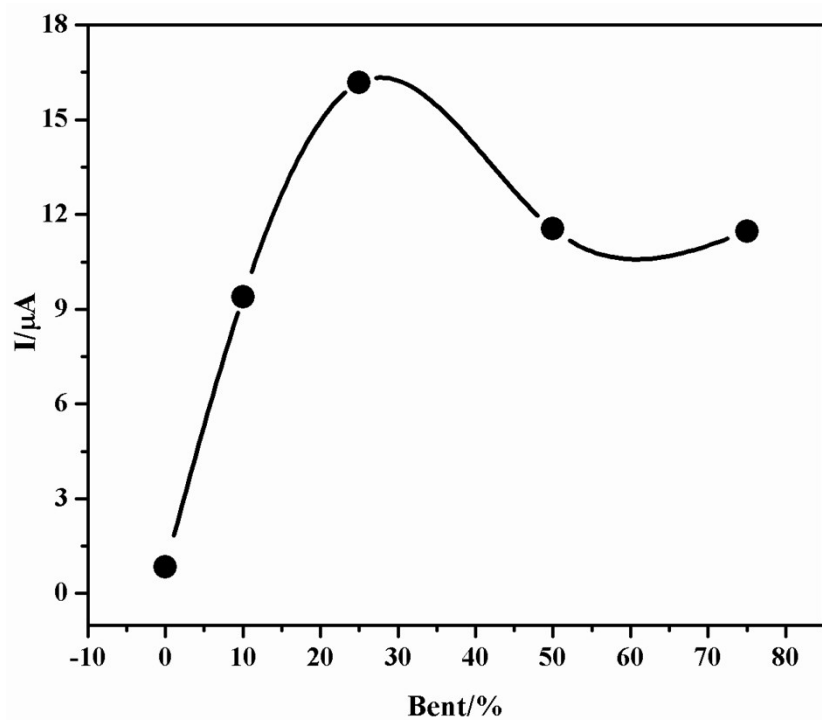

**Fig. S2** The dependence of oxidation peak current on the amount of Bent.

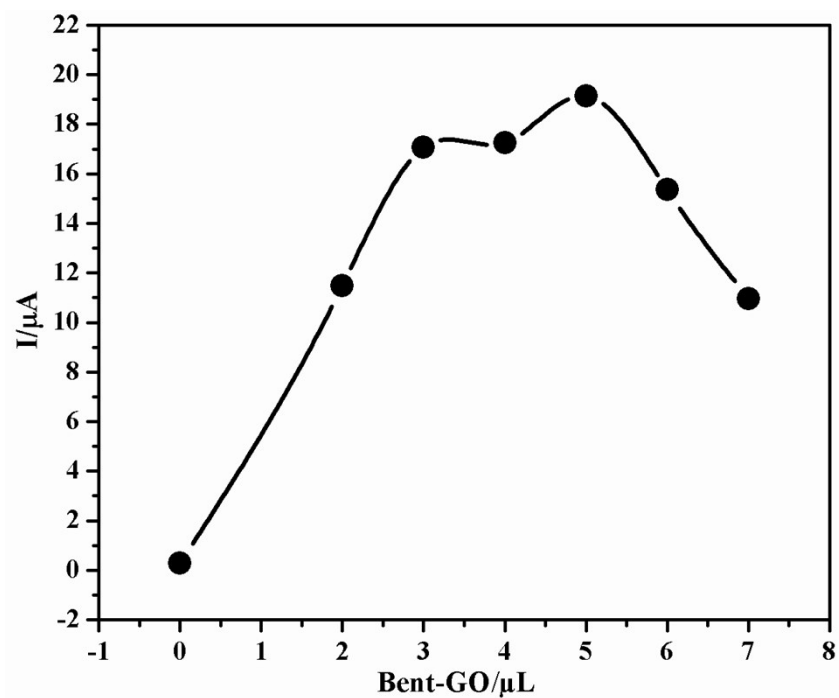

**Fig. S3** Effect of the amount of Bent-GO suspension on oxidation peak current 5  $\mu\text{M}$  MD in phosphate buffer of pH 3. Scan rate: 100  $\text{mV s}^{-1}$ ,  $t(\text{acc})$ : 90 s.

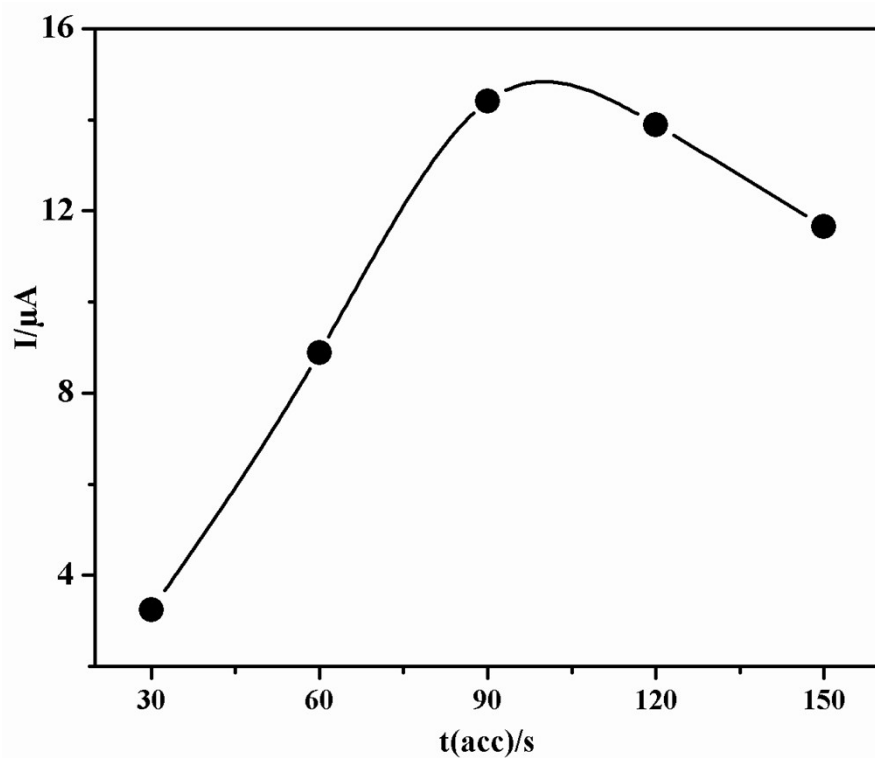

**Fig. S4** The effect of accumulation time,  $t(\text{acc})/\text{s}$  on peak current of  $5 \mu\text{M}$  MD at Bent-ErGO/GCE in phosphate buffer of pH 3.

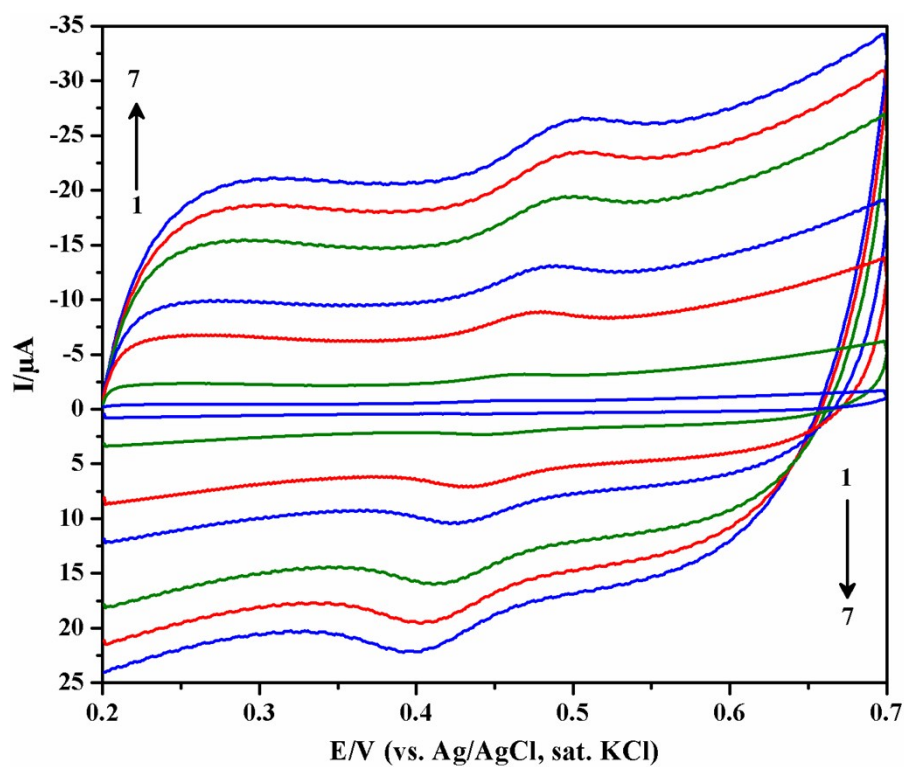

**Fig. S5** Cyclic voltammograms of  $5 \mu\text{M}$  MD on Bent-ErGO/GCE at different scan rates ( $10 - 550 \text{ mV s}^{-1}$ ) in phosphate buffer of pH 3.  $t(\text{acc})$ : 80 s.
